# Supplementary material
Source: MDPI journal article supplement (https://www.mdpi.com/2076-3417/10/6/2027)
Supplement: s1 [file s1]

## Supplementary material

# Pneumatically Actuated Microfluidic Platform for Reconstituting 3D Vascular Tissue Compression

Jungho Ahn <sup>1</sup>, Hyeok Lee <sup>1</sup>, Habin Kang <sup>2</sup>, Hyeri Choi <sup>2</sup>, Kyungmin Son <sup>1</sup>, James Yu <sup>2</sup>, Jungseub Lee <sup>1</sup>, Jungeun Lim <sup>1</sup>, Dohyun Park <sup>1</sup>, Maenghyo Cho <sup>1</sup> and Noo Li Jeon <sup>1,2,\*</sup>

<sup>1</sup> Department of Mechanical and Aerospace Engineering, Seoul National University, Seoul 151-742, Korea; a4900805@snu.ac.kr (J.A.); leehyeok20@gmail.com (H.L.); opklnmm12@gmail.com (K.S.); Seub1994@naver.com (J.L.); jlim357@gatech.edu (J.L.); parkkhdh@gmail.com (D.P.); mhcho@snu.ac.kr (M.C.)

<sup>2</sup> Bioengineering, Seoul National University, Seoul 151-742, Korea; habinkang6@gmail.com (H.K.); hchoi615@gmail.com (H.C.); james.yu@gmail.com (J.Y.)

\* Correspondence: [njeon@snu.ac.kr](mailto:njeon@snu.ac.kr)

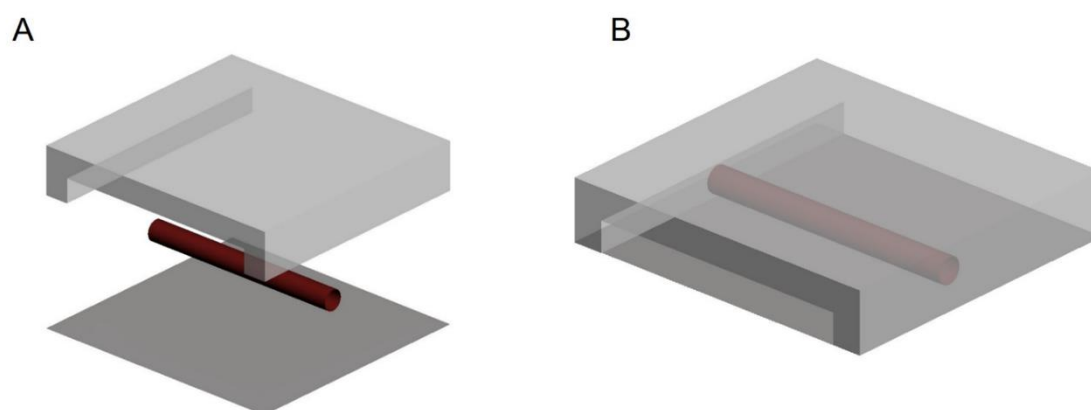

**Figure S1.** Simplified model to predict the deformation of PDMS membrane (gray) and blood vessel (dark red).

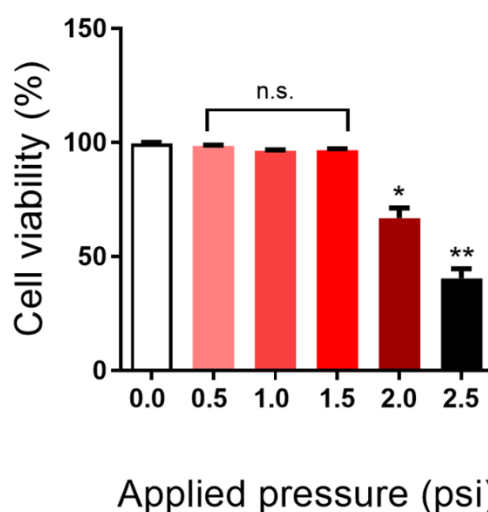

**Figure S2.** Endothelial cell viability according to different pressure.

**Supplementary material-Movie S1.** FEA modeling of the PDMS membrane deformation.

**Supplementary material-Movie S2.** FEA modeling of the blood vessel deformation.

**Supplementary material-Movie S3.** The effect of compressive stress to 3D perfusable microvessel network: microbead flowing test.
